# Supplementary material for: Patient and caregiver experiences with advanced cancer care: a qualitative study informing the development of an early palliative care pathway
Source: HighWire-hosted journal article supplement (doi:10.1136/bmjspcare-2020-002578), 2020-10-19
Supplement: bmjspcare-2020-002578supp001_data_supplement.pdf [file bmjspcare-2020-002578supp001_data_supplement.pdf]

APPENDIX A: CONCEPTUAL FRAMEWORK

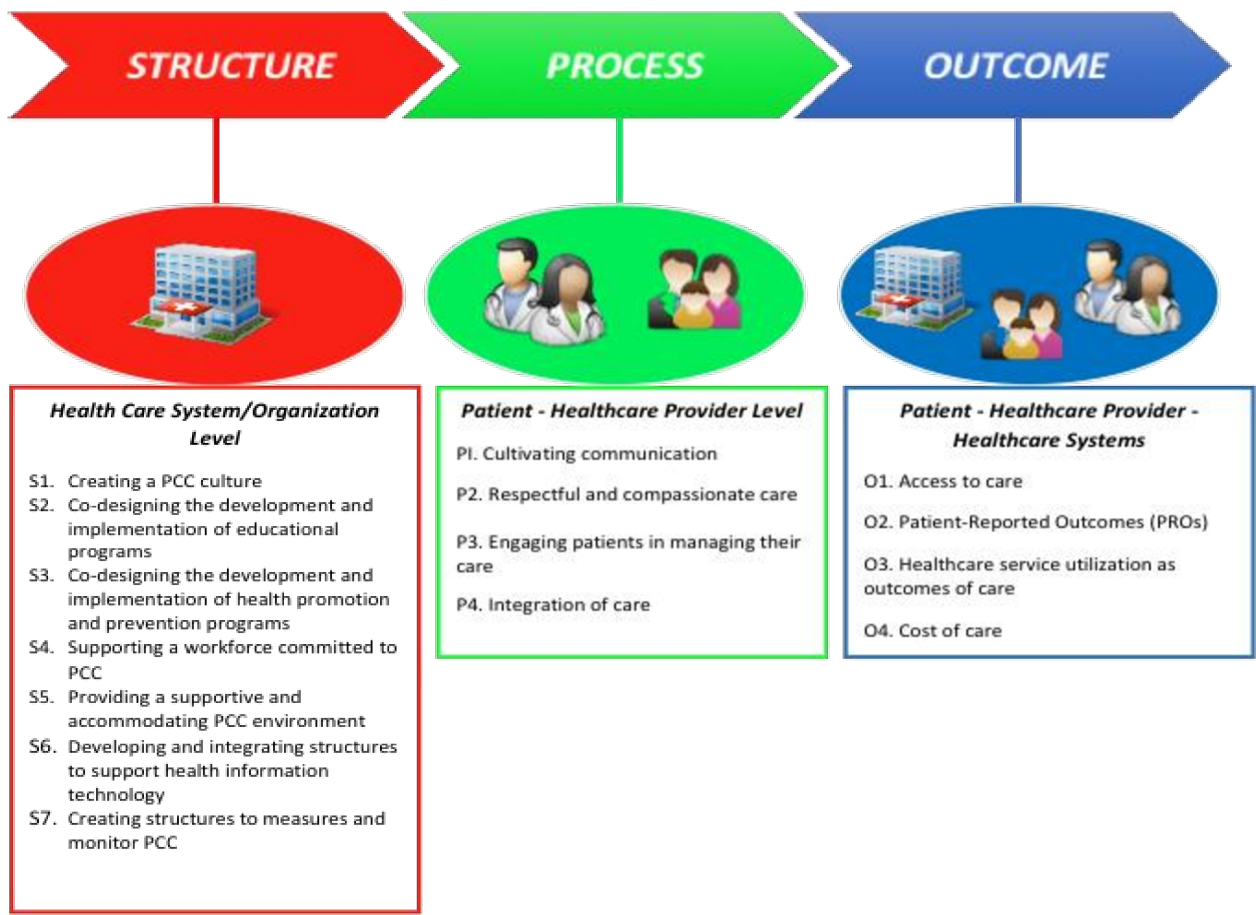

Santana MJ, Manalili K, Jolley RJ, Zelinsky S, Quan H, Lu M. How to practice person-centred care: A conceptual framework. *Health Expectations*. 2018;21(2):429-40.
